# Supplementary material for: Effects of S1 Cleavage on the Structure, Surface Export, and Signaling Activity of Human Notch1 and Notch2
Source: PubMed Central journal article supplement (PMC2726630; doi:10.1371/journal.pone.0006613), 2009-08-24
Supplement: pone.0006613.s002.pdf [file pone.0006613.s002.pdf]

□

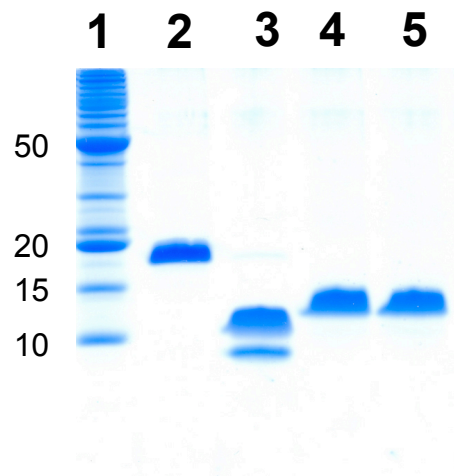

Figure S2
